# Supplementary material for: Highly efficient CsPbIBr2 perovskite solar cells with efficiency over 9.8% fabricated using a preheating-assisted spin-coating method
Source: Royal Society of Chemistry journal article supplement (doi:10.1039/c9ta03336j), 2019-01-01
Supplement: c9ta03336j1.pdf [file c9ta03336j1.pdf]

1 **Supporting Information**

2

3 **Highly Efficient CsPbIBr<sub>2</sub> Perovskite Solar Cells with Efficiency Over 9.8% Using Preheating-**  
4 **Assisted Spin-Coating Method**

5 Yuxiao Guo, Xingtian Yin\*, Jie Liu and Wenxiu Que\*

6 *Electronic Materials Research Laboratory, Key Laboratory of the Ministry of Education, International*  
7 *Center for Dielectric Research, Shaanxi Engineering Research Center of Advanced Energy Materials*  
8 *and Devices, School of Electronic & Information Engineering, Xi'an Jiaotong University, Xi'an*  
9 *710049, Shaanxi, People's Republic of China*

10 \*Corresponding author: xt\_yin@mail.xjtu.edu.cn (X. Yin) wxque@mail.xjtu.edu.cn (W. Que)

11

12

13

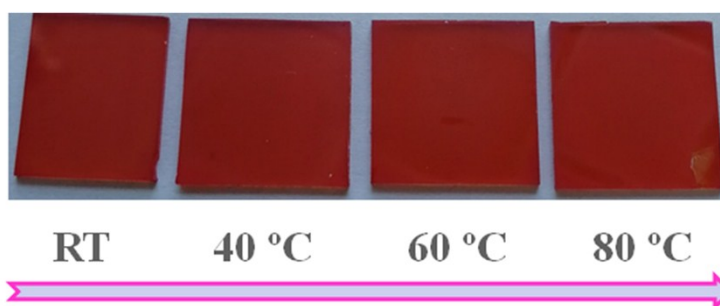

14

15 **Fig. S1** Optical images of CsPbIBr<sub>2</sub> films formed at different substrate preheating temperatures.

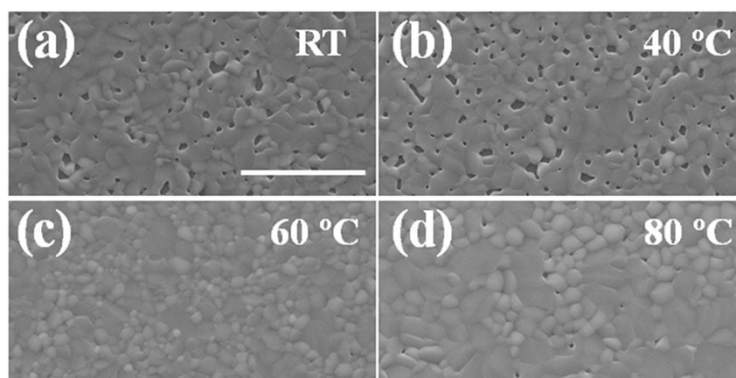

16

17 **Fig. S2** Large-scale top-view SEM images of CsPbIBr<sub>2</sub> films formed at different substrate preheating  
18 temperatures, the scale bar is 10 μm.

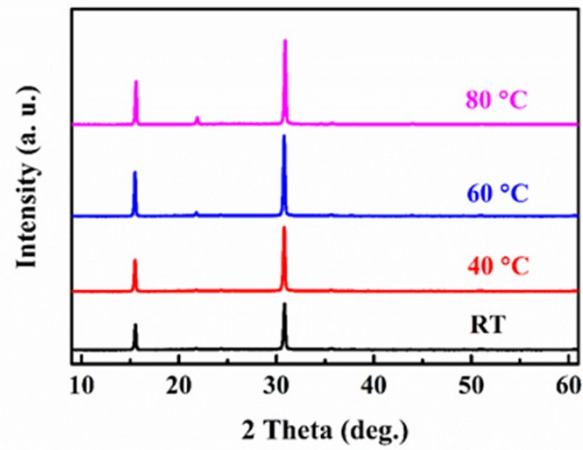

1

2 **Fig. S3** XRD patterns of CsPbIBr<sub>2</sub> films formed at different substrate preheating temperatures.

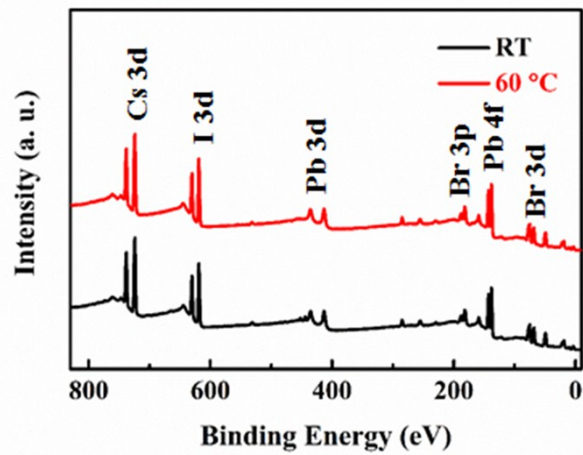

3

4 **Fig. S4** XPS survey spectra of CsPbIBr<sub>2</sub> films formed at RT and a substrate preheating temperature of

5

60 °C, respectively.

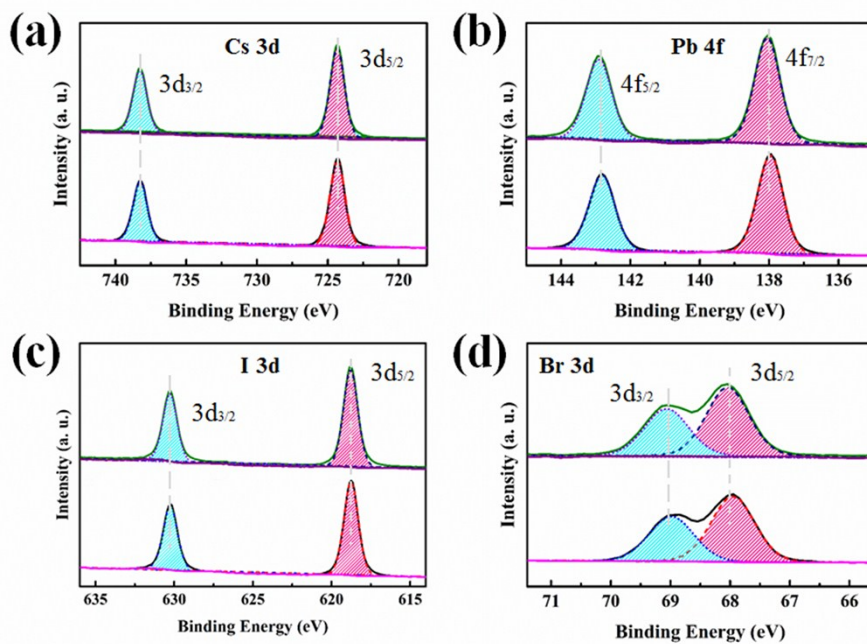

6

1 **Fig. S5** (a) Cs 3d, (b) Pb 4f, (c) I 3d and (d) Br 3d XPS core spectra of CsPbIBr<sub>2</sub> films formed at RT  
2 (below) and a substrate preheating temperature of 60 °C (above), respectively.

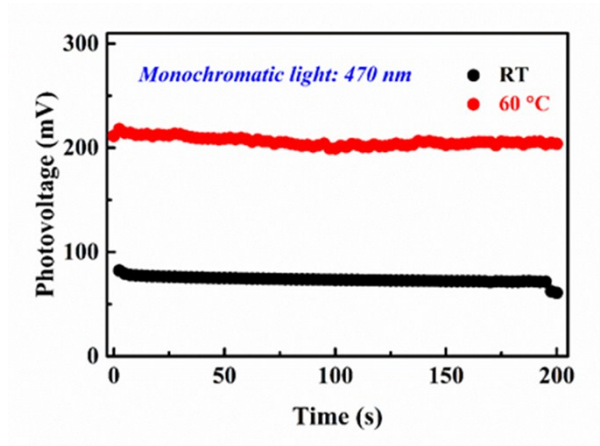

3  
4 **Fig. S6** SPV measurements of CsPbIBr<sub>2</sub> films formed at RT and a substrate preheating temperature of  
5 60 °C, respectively.

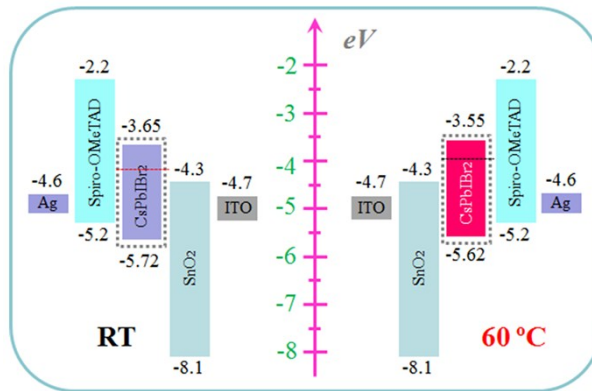

6  
7 **Fig. S7** Energy level diagrams of the devices based on CsPbIBr<sub>2</sub> films formed at RT and a substrate  
8 preheating temperature of 60 °C, respectively. The dot line indicates the fermi level of  
9 perovskites.

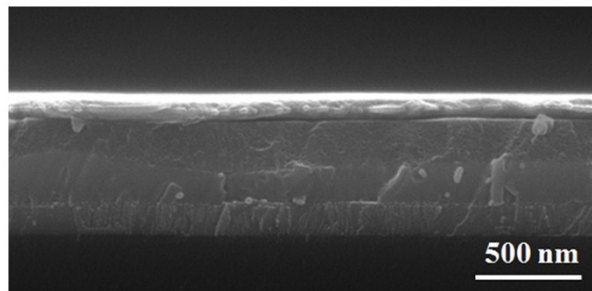

10  
11 **Fig. S8** Cross-sectional SEM image without color of the corresponding PSC structure.

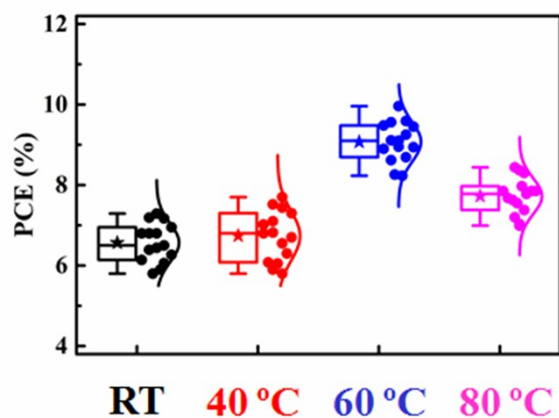

1  
 2 **Fig. S9** Statistic PCEs distributions of 15 independent cells over CsPbIBr<sub>2</sub> formed at different substrate  
 3 preheating temperatures.

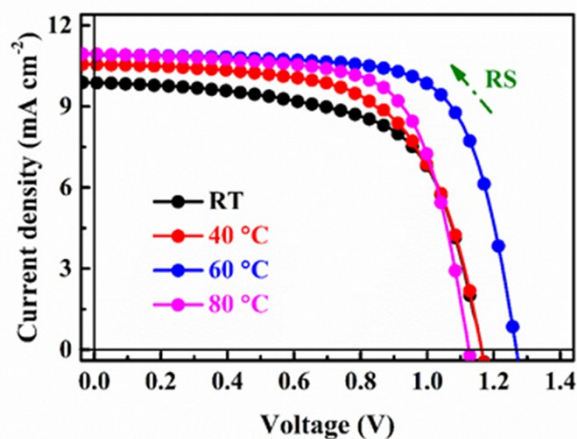

4  
 5 **Fig. S10** J-V curves of the champion cells over CsPbIBr<sub>2</sub> formed at different substrate preheating  
 6 temperatures.

7  
 8 **Table S1** Photovoltaic parameters of the champion devices over CsPbIBr<sub>2</sub> formed at different substrate  
 9 preheating temperatures.

| Substrate preheating temperature | V <sub>oc</sub> (V) | J <sub>sc</sub> (mA cm <sup>-2</sup> ) | FF   | PCE (%) |
|----------------------------------|---------------------|----------------------------------------|------|---------|
| RT                               | 9.88                | 1.165                                  | 0.63 | 7.29    |
| 40 °C                            | 10.55               | 1.162                                  | 0.63 | 7.70    |
| 60 °C                            | 10.92               | 1.267                                  | 0.71 | 9.86    |
| 80 °C                            | 10.94               | 1.125                                  | 0.69 | 8.44    |

10

11 **Table S2** The reported parameters of the cells over pure CsPbIBr<sub>2</sub> perovskite (measured under RS).

| Cell structure                                                                     | Perovskite fabrication method                      | V <sub>oc</sub> (V) | PCE (%) | Ref.             |
|------------------------------------------------------------------------------------|----------------------------------------------------|---------------------|---------|------------------|
| FTO/TiO <sub>2</sub> /SmBr <sub>3</sub> /CsPbIBr <sub>2</sub> / Spiro-OMeTAD/Au    | One-step spin coating                              | 1.170               | 10.88   | 1                |
| FTO/TiO <sub>2</sub> (CsBr)/CsPbIBr <sub>2</sub> /Carbon                           | One-step spin coating & Intermolecular exchange    | 1.261               | 10.71   | 2                |
| FTO/c-TiO <sub>2</sub> /CsPbIBr <sub>2</sub> /Carbon                               | One-step spin coating                              | 1.171               | 5.49    | 3                |
|                                                                                    | One-step spin coating & Intermolecular exchange    | 1.245               | 9.16    |                  |
| FTO/NiO <sub>x</sub> /CsPbIBr <sub>2</sub> /MoO <sub>x</sub> /Au                   | One-step spin coating                              | 0.850               | 5.52    | 4                |
| FTO/c-TiO <sub>2</sub> /CsPbIBr <sub>2</sub> / Spiro-OMeTAD/Au                     | One-step spin coating (Gas-assisted)               | 1.227               | 8.02    | 5                |
| FTO/c-TiO <sub>2</sub> /CsPbIBr <sub>2</sub> /Au                                   | Dual source evaporation                            | 0.959               | 4.7     | 6                |
| ITO/SnO <sub>2</sub> /C <sub>60</sub> /CsPbIBr <sub>2</sub> / Spiro-OMeTAD/Au      | One-step spin coating (Antisolvent: chlorobenzene) | 1.180               | 7.34    | 7                |
| ITO/SnO <sub>2</sub> /CsPbIBr <sub>2</sub> / Spiro-OMeTAD/Ag                       | One-step spin coating                              | 1.165               | 7.29    | <b>This work</b> |
|                                                                                    | One-step spin coating (Preheating-assist)          | 1.267               | 9.86    |                  |
| ITO/In <sub>2</sub> S <sub>3</sub> /CsPbIBr <sub>2</sub> / Spiro-OMeTAD/Au         | One-step spin coating                              | 1.090               | 5.59    | 8                |
| FTO/c-TiO <sub>2</sub> / CsPbIBr <sub>2</sub> /Carbon                              | One-step spin coating                              | 1.114               | 5.82    | 9                |
|                                                                                    | One-step spin coating (Light Processing)           | 1.283               | 8.60    |                  |
| ITO/SnO <sub>2</sub> /CsPbIBr <sub>2</sub> /Carbon                                 | One-step spin coating                              | 1.230               | 7.00    | 10               |
| FTO/c-TiO <sub>2</sub> /CsPbIBr <sub>2</sub> /spiro-OMeTAD/Au                      | One-step spin coating                              | 1.100               | 6.36    | 11               |
|                                                                                    | One-step spin coating (PEG-passivation)            | 1.280               | 7.31    |                  |
| FTO/c-TiO <sub>2</sub> /CsPbIBr <sub>2</sub> /carbon                               | One-step spin coating (Precursor aging)            | 1.142               | 6.55    | 12               |
| FTO/c-TiO <sub>2</sub> /m-TiO <sub>2</sub> / CsPbIBr <sub>2</sub> /Spiro-OMeTAD/Au | Two-step solution (Spraying assist)                | 1.127               | 6.3     | 13               |
| FTO/c-TiO <sub>2</sub> /m-TiO <sub>2</sub> / CsPbIBr <sub>2</sub> /Carbon          | Two-step solution                                  | 1.080               | 8.25    | 14               |
| FTO/c-TiO <sub>2</sub> /m-TiO <sub>2</sub> / CsPbIBr <sub>2</sub> /Carbon          | Two-step solution                                  | 0.960               | 6.14    | 15               |

|                                                    |                   |       |      |    |
|----------------------------------------------------|-------------------|-------|------|----|
| FTO/NiO <sub>x</sub> /CsPbIBr <sub>2</sub> /ZnO/Al | Two-step solution | 1.010 | 5.57 | 16 |
|----------------------------------------------------|-------------------|-------|------|----|

1

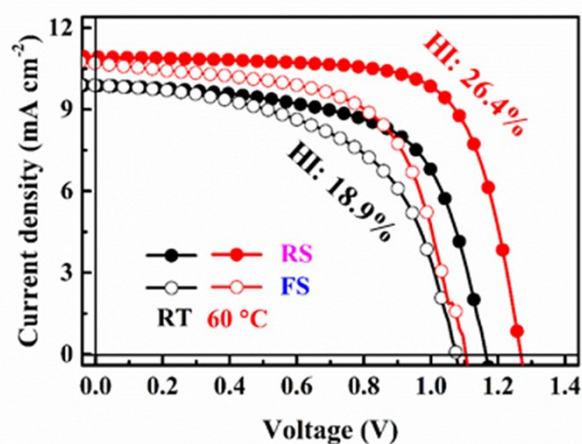

2

3 **Fig. S11** J-V curves of cells measured under both forward and reverse scan directions.

4

5 **Table S3** Summary of the electrochemical impedance spectra (EIS) parameters analyzed in Fig. 4g  
6 with fitting the Nyquist plots.

| Substrate preheating temperature | $R_s$ ( $\Omega$ ) | Transport resistance ( $R_{tr}$ ) ( $\Omega$ ) | Recombination resistance ( $R_{rec}$ ) ( $\Omega$ ) |
|----------------------------------|--------------------|------------------------------------------------|-----------------------------------------------------|
| RT                               | 8.6                | 1140                                           | 260                                                 |
| 60 °C                            | 6.7                | 1835                                           | 3250                                                |

7

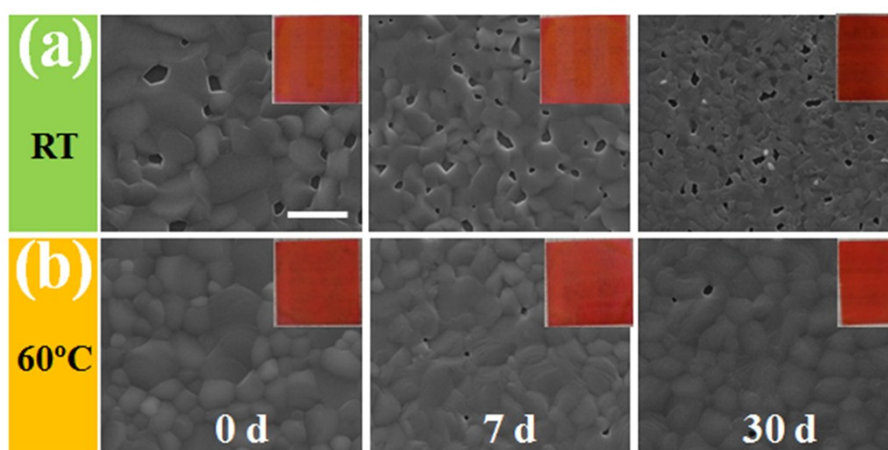

8

9 **Fig. S12** The morphological evolution of the CsPbIBr<sub>2</sub> films formed at (a) RT and (b) a substrate  
10 preheating temperature of 60 °C, respectively, under an ambient atmosphere of ~25 °C and  
11 ~35% RH. Insets are pictures of the corresponding perovskite films, and the scale bar is 2  
12  $\mu\text{m}$ .

## 1 References

- 2 1. W. S. Subhani, K. Wang, M. Du, X. Wang and S. Liu, *Adv. Energy Mater.*, 2019, **9**, 1803785.
- 3 2. W. Zhu, Z. Zhang, W. Chai, Q. Zhang, D. Chen, Z. Lin, J. Chang, J. Zhang, C. Zhang and Y. Hao,  
4 *ChemSusChem*, 2019, **12**, 2318-2325.
- 5 3. W. Zhu, Q. Zhang, D. Chen, Z. Zhang, Z. Lin, J. Chang, J. Zhang, C. Zhang and Y. Hao, *Adv.*  
6 *Energy Mater.*, 2018, **8**, 1802080.
- 7 4. C. Liu, W. Li, J. Chen, J. Fan, Y. Mai and R. E. I. Schropp, *Nano Energy*, 2017, **41**, 75-83.
- 8 5. W. Li, M. U. Rothmann, A. Liu, Z. Wang, Y. Zhang, A. R. Pascoe, J. Lu, L. Jiang, Y. Chen, F.  
9 Huang, Y. Peng, Q. Bao, J. Etheridge, U. Bach and Y.-B. Cheng, *Adv. Energy Mater.*, 2017, **7**,  
10 1700946.
- 11 6. Q. Ma, S. Huang, X. Wen, M. A. Green and A. W. Y. Ho-Baillie, *Adv. Energy Mater.*, 2016, **6**,  
12 1502202.
- 13 7. N. Li, Z. Zhu, J. Li, A. K. Y. Jen and L. Wang, *Adv. Energy Mater.*, 2018, **8**, 1800525.
- 14 8. B. Yang, M. Wang, X. Hu, T. Zhou, Z. Zang, *Nano Energy*, 2019, **57** 718-727.
- 15 9. Q. Zhang, W. Zhu, D. Chen, Z. Zhang, Z. Lin, J. Chang, J. Zhang, C. Zhang and Y. Hao, *ACS*  
16 *Appl. Mater. Interfaces*, 2018, **11**, 2997-3005.
- 17 10. Z. Guo, S. Teo, Z. Xu, C. Zhang, Y. Kamata, S. Hayase and T. Ma, *J. Mater. Chem. A*, 2019, **7**,  
18 1227-1232.
- 19 11. J. Lu, S.-C. Chen and Q. Zheng, *ACS Appl. Energy Mater.*, 2018, **1**, 5872-5878.
- 20 12. W. Zhu, Q. Zhang, C. Zhang, Z. Zhang, D. Chen, Z. Lin, J. Chang, J. Zhang and Y. Hao, *ACS*  
21 *Appl. Energy Mater.*, 2018, **1**, 4991-4997.
- 22 13. C. F. J. Lau, X. Deng, Q. Ma, J. Zheng, J. S. Yun, M. A. Green, S. Huang and A. W. Y. Ho-  
23 Baillie, *ACS Energy Lett.*, 2016, **1**, 573-577.
- 24 14. J. Liang, P. Zhao, C. Wang, Y. Wang, Y. Hu, G. Zhu, L. Ma, J. Liu and Z. Jin, *J. Am. Chem. Soc.*,  
25 2017, **139**, 14009-14012.
- 26 15. J. Liang, Z. Liu, L. Qiu, Z. Hawash, L. Meng, Z. Wu, Y. Jiang, L. K. Ono and Y. Qi, *Adv. Energy*  
27 *Mater.*, 2018, **8**, 1800504.
- 28 16. J. Lin, M. Lai, L. Dou, C. S. Kley, H. Chen, F. Peng, J. Sun, D. Lu, S. A. Hawks, C. Xie, F. Cui,  
29 A. P. Alivisatos, D. T. Limmer and P. Yang, *Nat. Mater.*, 2018, **17**, 261-267.
